# Supplementary material
Source: Preprints.org preprint supplement (doi:10.20944/preprints202110.0015.v1)
Supplement: Supplementary file 1 [file supplementary]

Figures

**Fig 1. Cumulative Search Volume from January 2011 to December 2020 for Stroke Related Topics used in this Study**

**Fig 2. Social Media Communities by Affiliation**

**Fig 3. Social Media Communities by Followers and Affiliation**

**Fig 4. Social Media Communities by Followers and Posts**

**Fig 5. Variations in New Social Media Communities by Year**

**Fig 6. Social media Communities by Community Purpose and Followers**

**Fig 7. Average Interaction based on User Likes, Comments and Shares for Different Content Types**

**Fig 8. Most Interacted Topics based on Content Types**
